# Supplementary material
Source: PubMed Central journal article supplement (PMC3020014)
Supplement: supp_85_2_905__1.pdf [file supp_85_2_905__1.pdf]

Supplemental Table 1

| Mab Name          | V-allele    | D-allele    | J-allele | CDR3 amino acid       |
|-------------------|-------------|-------------|----------|-----------------------|
| 8.9D Heavy chain  | IGHV3-15*01 | IGHD4-04*01 | IGHJ4*02 | TTVLTTRDRAY<br>DAGSDY |
| 6.4C Heavy chain  | IGHV3-15*01 | IGHD4-04*01 | IGHJ4*02 | TTVLTTRDRAY<br>DAGSDN |
| 10.9D Heavy chain | IGHV3-15*01 | IGHD5-12*01 | IGHJ4*02 | TTVLTTRDSAY<br>DAGIGY |
| 6.1C Heavy chain  | IGHV3-15*01 | IGHD5-12*01 | IGHJ4*02 | TTVLTTRDSAY<br>DAGIGY |
| 13.6A Heavy chain | IGHV3-15*01 | IGHD5-12*01 | IGHJ4*02 | TTVLTTRDSAY<br>DAGIGY |

<sup>a</sup> Non-templated nucleotides added at the DJ junction.

<sup>b</sup> The replacement to silent mutation ratio found in the framework regions.

<sup>c</sup> The replacement to silent mutation ratio found in the complementarity-determining

| DJ n nucleotides <sup>a</sup> | DJ junction                 | Number of Mutations from Germline | Frequency of Mutations | R/S ratio FR <sup>b</sup> | R/S ratio CDR <sup>c</sup> |
|-------------------------------|-----------------------------|-----------------------------------|------------------------|---------------------------|----------------------------|
| 23                            | ATAGAGCCTACG<br>ATGCAGGGAGC | 26                                | 8.84%                  | 13/5                      | 8/0                        |
| 22                            | ATCGTGCCTACG<br>ATGCAGGGAG  | 38                                | 12.93%                 | 13/12                     | 10/3                       |
| 11                            | GCAGGGATCGG                 | 13                                | 4.42%                  | 4/4                       | 5/0                        |
| 11                            | GCAGGGATCGG                 | 12                                | 4.08%                  | 3/4                       | 5/0                        |
| 11                            | GCAGGGATCGG                 | 11                                | 3.74%                  | 4/2                       | 5/0                        |

regions.
